# Supplementary material for: Oncogenic function of the homeobox A13-long noncoding RNA HOTTIP-insulin growth factor-binding protein 3 axis in human gastric cancer
Source: Oncotarget. 2016 Apr 29;7(24):36049–64. doi: 10.18632/oncotarget.9102 (PMC5094982; doi:10.18632/oncotarget.9102)
Supplement: Supplementary file 1 [file oncotarget-07-36049-s001.pdf]

# Oncogenic function of the homeobox A13-long noncoding RNA HOTTIP-insulin growth factor-binding protein 3 axis in human gastric cancer

## Supplementary Materials

### MATERIALS AND METHODS

#### Plasmids, small interference RNA (siRNA) and short hairpin RNA (shRNA) lentivirus

The expression plasmids of human HoxA13 cDNA and HoxA13 promoter were obtained from the RIKEN DNA Bank (IRAK168L10; Tsukuba, Ibaraki, Japan) and Active motif (NM000522.4; Carlsbad, CA, USA), and inserted into the pcDNA3 (Invitrogen-Thermo Fisher Scientific, Waltham, MA, USA) and pGL4 luciferase vectors (Promega Corp., Madison, WI, USA), respectively, to generate pcDNA-Flag-HoxA13 and HoxA13 promoter-luciferase. The mutant of E1 of HoxA13 promoter was generated by Polymerase chain reaction (PCR) using the primer of 5'-ATGAACAACCACCCTAACACAAC-3'. Human IGFBP-3 promoter [-2,282 nucleotide (nt) to +56 nt]-luciferase and its series of mutants were gifts by Dr. T. Hanafusa (Okayama, University) [1]. All constructs were confirmed by DNA sequencing. The HoxA13 shRNA lentivirus, the GFP shRNA or scrambled shRNA lentivirus were generated in 293T cells that had been cotransfected with pCAG-HIVgp, pCMV-VSV-G-RSV-Rev, and TRCN0000004881 (Academia Sinica, Taipei, Taiwan) or PLKO.1-GFP (#30323; Addgene, Cambridge, MA, USA) or scrambled control shRNA (Sigma-Aldrich, St. Louis, MO, USA). Virus supernatants were collected 72 h after transfection, and particles were purified as described [2]. The CS12 cells ( $1 \times 10^6$ ) were infected with shRNA HoxA13 lentiviruses or scrambled shRNA at a multiplicity of infection of 4. After cultivation for 3 days, cells were injected into SCID mice ( $5 \times 10^6$  cells/spot). For siRNA-mediated gene knockdown, cells were transfected with negative control siRNA (Thermo Fisher Scientific, D-001810-10-05) or the following specific siRNA-like IGFBP-3-targeting siRNA (Ambion-Thermo Fisher, s7227, s7228, s7229), HoxA13-targeting siRNA (Ambion-Thermo Fisher; s106130, s6785, 6886, 6787) or HOTTIP-targeting siRNA (Sigma-Aldrich, LQ-011052-00-0002) or c-JUN-targeting siRNA (Ambion-Thermo Fisher: s7658) using Lipofectamine RNA/MAX reagents (Thermo Fisher) [3–5]. All sequences were run on BLAST, to exclude sequences that would suppress undesired genes and to ensure specificity. The cells were harvested after 48 h of incubation, and the effects of the compound alone on gene expression were assessed.

#### Cell proliferation, colony assay and cell cycle analyses

The living cells were counted using the trypan blue dye-exclusion method, and were analyzed by flow cytometry to identify the sub-G<sub>1</sub> population of cells [3]. MTT assay was assayed as followed to the manufacturers' instructions as described elsewhere [4, 5]. A colony assay was performed as described elsewhere [3]. Briefly, cells were plated in duplicate at  $5 \times 10^2$  or  $5 \times 10^3$  cells per gelatin-coated dish. Two weeks later, colonies with a diameter > 2 mm were counted after staining with Giemsa staining solution (Wako Chemical Co., Tokyo, Japan). For analysis of the cell cycle [6], serum-starved cells were further cultured further in DMEM containing 15% FBS and collected at the indicated times. Harvested cells were stained with propidium iodide (PI; 1  $\mu$ g/mL), and subjected to a fluorescence-activated analysis of DNA content in a flow cytometer (EPICS XL-MCL; Beckman Coulter, Miami, FL, USA).

#### Migration, invasion, and chemoresistance assays

Cells ( $1 \times 10^4$  cells) cultured in DMEM without FBS were seeded in the upper Transwell plate coated with or without matrix gel (Corning, Inc., NY, USA; 1 mg/mL). The lower plate contained DMEM plus 10% FBS. Three days later, the cells on the lower plate of the Transwell were fixed with 4% formaldehyde, stained with 1% crystal violet, and subsequently, and the cells were counted under a microscope. Regarding chemoresistance assay, cells were seeded in 96-well plates and incubated for 24 h, to allow cell attachment. DMEM containing a serial dilution of 5-fluorouracil (20  $\mu$ g/mL) was added, and the cells were incubated for an additional 48 h in 5% CO<sub>2</sub>. Cell viability was examined using the MTT assay.

#### Teratoma formation assay, alkaline phosphatase and immunohistochemistry

Induced pluripotent stem cells (iPS-like cells) (200 cells; one colony/spot) were injected subcutaneously into the dorsal flank of severe combined immunodeficiency (SCID) mice, as described elsewhere [7]. The teratomas that formed after the injection were fixed in 4% paraformaldehyde overnight and embedded in paraffin. Sections were stained with hematoxylin and

eosin. Measurement of alkaline phosphatase activity measurement and immunocytochemistry were performed as described elsewhere [7].

### Immunoprecipitation and western blotting

Immunoprecipitation and western blotting were performed as described elsewhere [3–7].

### Reverse transcriptase PCR (RT-PCR) and quantitative polymerase chain reaction (qPCR)

Total RNA was extracted from cells using the TRIzol reagent (Thermo Fisher scientific). RNA was reverse transcribed to cDNA using a reverse transcription kit (Promega). PCR was performed using the GoTaq® green master mix (Promega). qPCR was performed using the Quantifast SYBR green PCR kit (Qiagen, Gaithersburg, MD, USA) as described elsewhere [3–7]. Amplification curves and gene expression were normalized to those of  $\beta$ -actin or GAPDH which was used as an internal control. The primers used for qPCR are listed in the Supplementary Tables 3–6.

### Transient transfection and luciferase assay

Transient transfection and luciferase assay were performed as described [3–7]. Cells were plated into each well of a 12-well plate and cultured for 24 h. The cells were then cotransfected with the indicated amount of constructs carrying the IGFBP3-promoter, HoxA13-promoter-luciferase reporters and with or without increasing dose of HoxA13, using Lipofectamine 2000 (Invitrogen). The total amount of transfected DNA was kept constant at 1  $\mu$ g/well by the addition of pBluescript. After 48 h or the indicated period of incubation, the cells were harvested and the activities of luciferase were measured in an illuminometer (Berthold Technologies GmbH and Co. KG, Bad Wildbad, Germany) using the Dual-Luciferase Reporter Assay System (Promega). Luciferase activity values were normalized to transfection efficiency.

### Statistical analysis

The data are presented as the mean  $\pm$  SEM from triplicate experiments and additional replicates as indicated. Significance was assessed using two-way

ANOVA ( $P < 0.0001$ ) followed by two-tailed student's  $t$ -tests. Survival analysis was performed using the Kaplan–Meier method, and the curves were compared using the log-rank test. A  $P$  value  $< 0.05$  was considered statistically significance.

### REFERENCES

1. Hanafusa T, Shinji T, Shiraha H, Nouso K, Iwasaki Y, Yumoto E, Ono T, Koide N. Functional promoter upstream p53 regulatory sequence of IGFBP3 that is silenced by tumor specific methylation. *BMC cancer*. 2005; 5:9.
2. Miyoshi H, Takahashi M, Gage FH, Verma IM. Stable and efficient gene transfer into the retina using an HIV-based lentiviral vector. *Proc Natl Acad Sci U S A*. . 1997; 94:10319–10323.
3. Pan J, Nakade K, Huang YC, Zhu ZW, Masuzaki S, Hasegawa H, Murata T, Yoshiki A, Yamaguchi N, Lee CH, Yang WC, Tsai EM, Obata Y, et al. Suppression of cell-cycle progression by Jun dimerization protein-2 (JDP2) involves downregulation of cyclin-A2. *Oncogene*. 2010; 29:6245–6256.
4. Kawasaki H, Song J, Eckner R, Ugai H, Chiu R, Taira K, Shi Y, Jones N, Yokoyama KK. p300 and ATF-2 are components of the DRF complex, which regulates retinoic acid- and E1A-mediated transcription of the c-jun gene in F9 cells. *Genes & Dev*. 1998; 12:233–245.
5. Kawasaki H, Eckner R, Yao TP, Taira K, Chiu R, Livingston DM, Yokoyama KK. Distinct roles of the co-activators p300 and CBP in retinoic-acid-induced F9-cell differentiation. *Nature*. 1998; 393:284–289.
6. Tanigawa S, Lee CH, Lin CS, Ku CC, Hasegawa H, Qin S, Kawahara A, Korenori Y, Miyamori K, Noguchi M, Lee LH, Lin YC, Steve Lin CL, et al. Jun dimerization protein 2 is a critical component of the Nrf2/MafK complex regulating the response to ROS homeostasis. *Cell Death Dis*. 2013; 4:e921.
7. Wang SW, Wang SS, Wu DC, Lin YC, Ku CC, Wu CC, Chai CY, Lee JN, Tsai EM, Lin CL, Yang RC, Ko YC, Yu HS, et al. Androgen receptor-mediated apoptosis in bovine testicular induced pluripotent stem cells in response to phthalate esters. *Cell Death & Dis*. 2013; 4:e907.

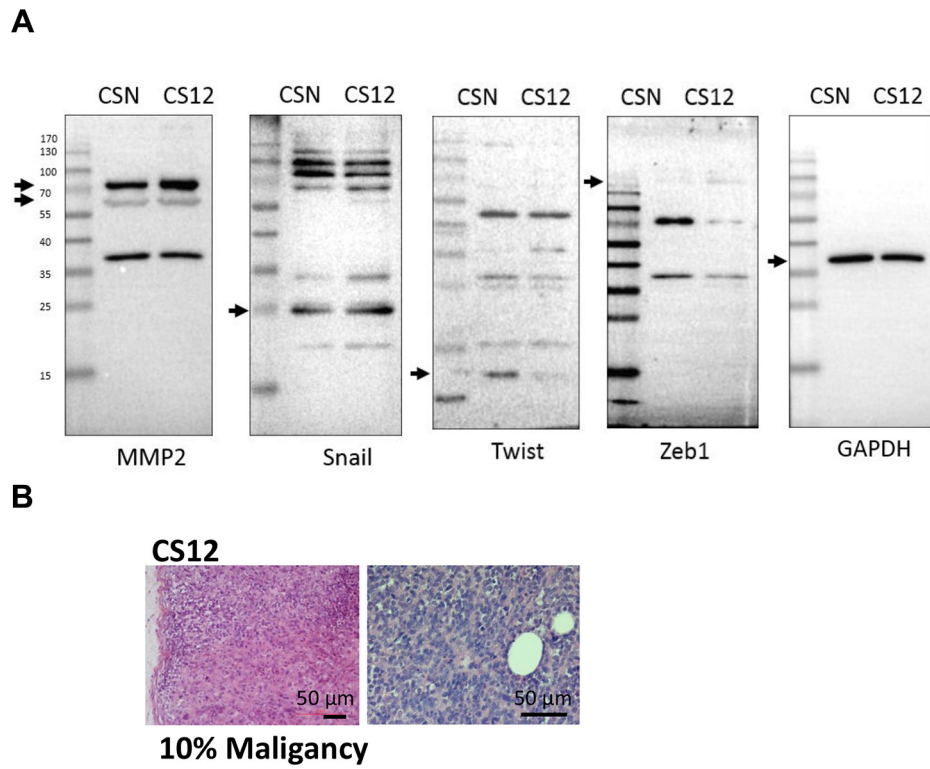

**Supplementary Figure S1: Comparative expression of EMT related marker proteins between CSN and CS12 cells and HE staining of tumor in SCID mice derived from CS12.** (A) Western blots of EMT related proteins in CSN and CS12 cells. Arrowhead is the position of the indicated protein. (B) Tumor morphology of transplants in SCID mice subcutaneously injected with CS12 cells. 10% of CS12 sample shows the malignancy. The bar indicated 50  $\mu$ m.

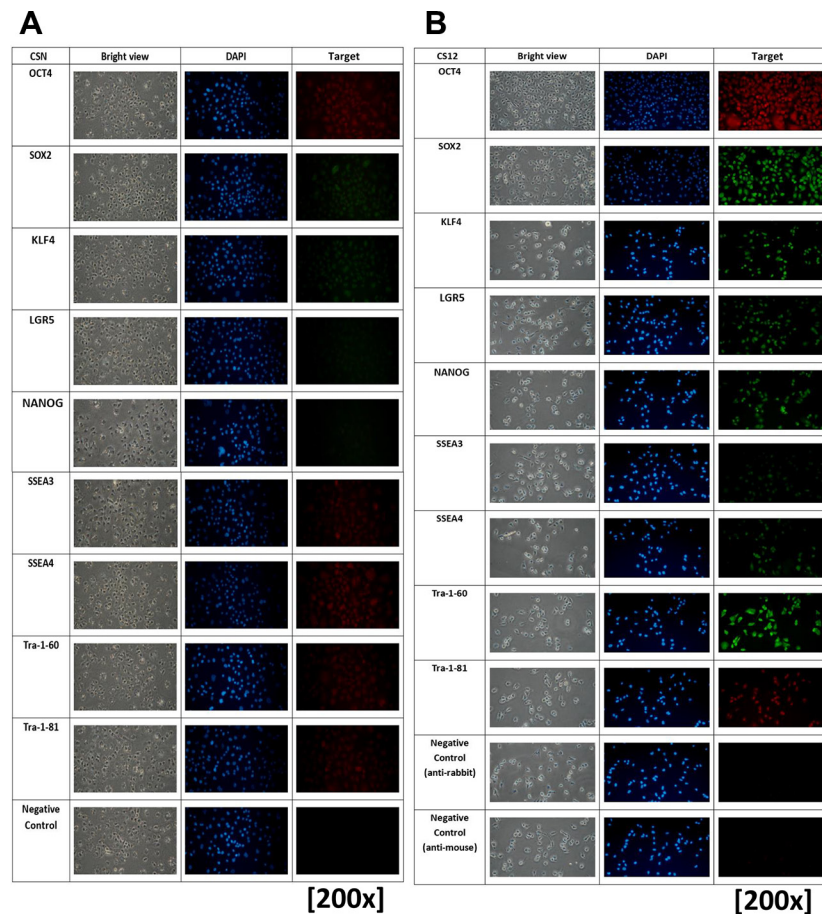

**C**

|          | CSN | CS12 |
|----------|-----|------|
| OCT4     | +   | +    |
| SOX2     | +   | +    |
| KLF4     | +   | +    |
| LGR5     | —   | +    |
| NANOG    | —   | +    |
| SSEA3    | +   | +    |
| SSEA4    | +   | +    |
| TRa-1-60 | +   | +    |
| TRa-1-81 | +   | +    |

**D**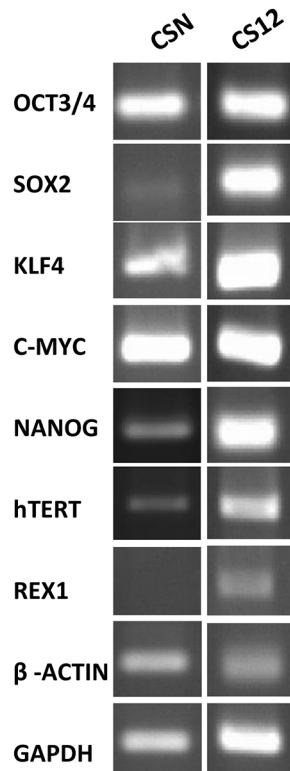**E**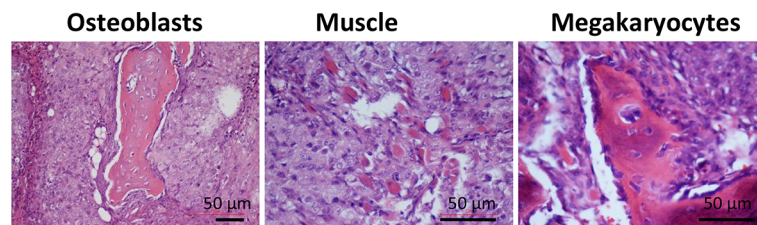

**Supplementary Figure S2: Comparative characterization of CSN and CS12 cell lines.** (A, B) Morphology and immunostaining of NANOG and LGR5 in CSN cells (A) and CS12 cells (B). Negative control is the isotype of the used indicated antibodies. DNA was stained with 4', 6-diamino-2-phenylindole (DAPI) and red fluorescence protein (RFP)/green fluorescence protein (GFP) indicate the secondary RFP and GFP antibodies, respectively. The bars indicated 50  $\mu$ m. (C) Summary of expression of stemness markers in CSN and CSA12 cells. LGR5 and NANOG were not expressed in CSN normal cells. (D) Semiquantitative RT-PCR study of stemness genes in CNS and CS12 cells. SOX2, NANOG, hTERT, and REX 1 genes are expressed at significantly higher levels in CS12 cells compared with CSN cells. (E) Pluripotency of human CS12 cells. Teratoma formation 6–8 weeks after the transplantation of CS12 cells into SCID mice was investigated. Teratoma were sectioned and stained with hematoxylin and eosin. Osteoblasts, muscle cells and megakaryocytes were detected. Histology of tumor slices derived from CS12 cells showed about 10% of cells exhibited malignancy. The observed higher nucleus/cytoplasm ratio is a typical feature of the cancer phenotype. The bars indicate as 50  $\mu$ m.

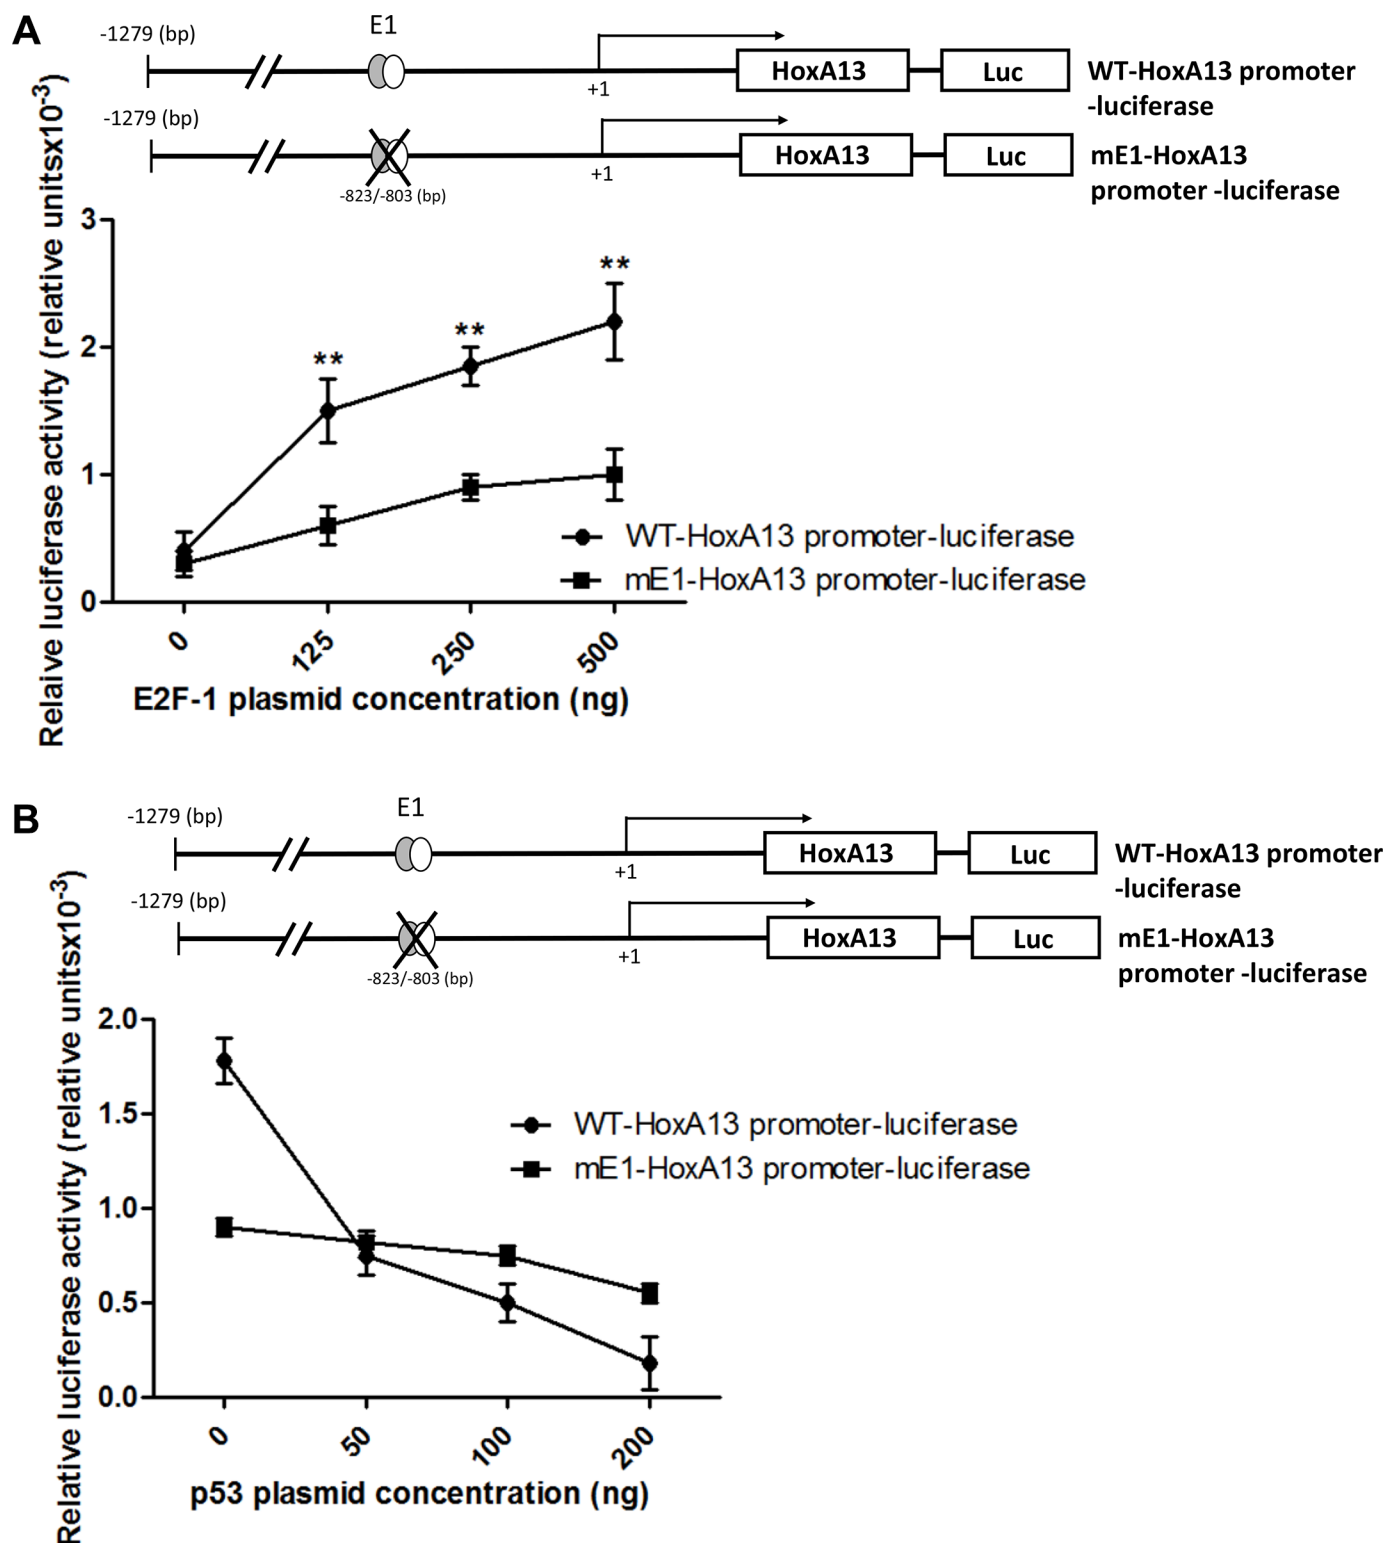

**Supplementary Figure S3: Effect of E2F-1 and p53 on HoxA13 promoter activity in CSN cells.** Schematic representation of WT HoxA13 promoter and mE1-HoxA13 promoter constructs. E1 elements were mutated as described in Materials and Methods. Effect of E2F-1 expression vector was examined as transactivation activity. WT-HoxA13 promoter-luciferase and mE1-HoxA13 promoter-luciferases and E2F-1 expression vector pCMV-SPORT6-E2F-1 (0, 125, 250 and 500 ng) were transfected into CSN cells, and the luciferase activity was measured. The values are expressed as means  $\pm$  S.D. and *t* tests were used to compare these values ( $n = 5$ ,  $**P < 0.01$ ). (B) Effect of p53 expression vector was examined. WT-HoxA13 promoter-luciferase and mE1-HoxA13 promoter-luciferases and p53 expression vector pCAG-p53 WT (0, 50, 100 and 200 ng) were transfected into CSN cells, and the luciferase activity was measured. The values are expressed as means  $\pm$  S.D. and *t* tests were used to compare these values ( $n = 3$ ,  $**P < 0.01$ ).

**A**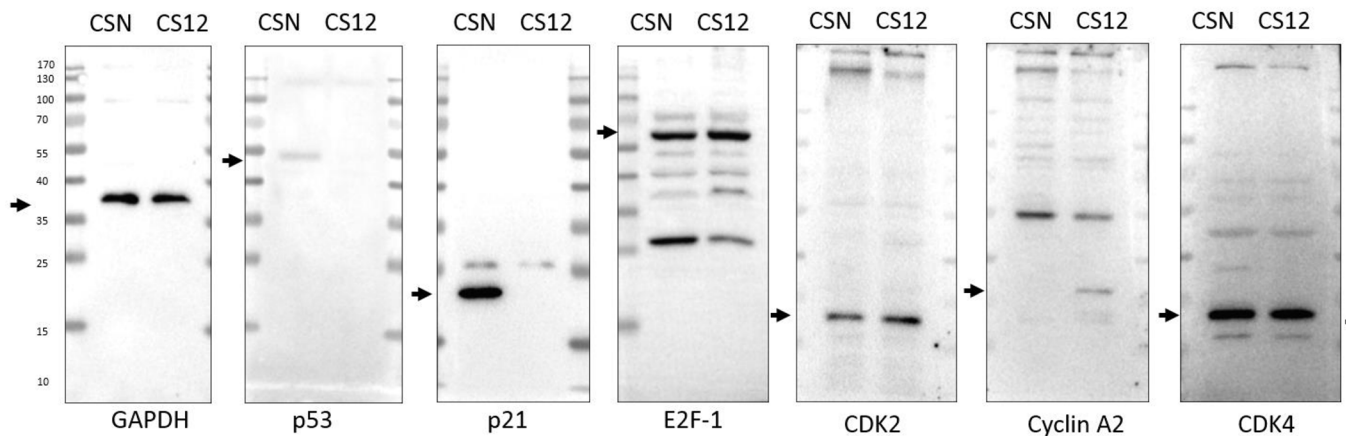**B**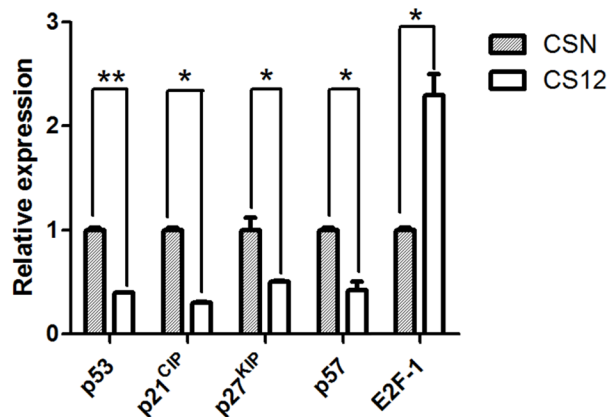**C**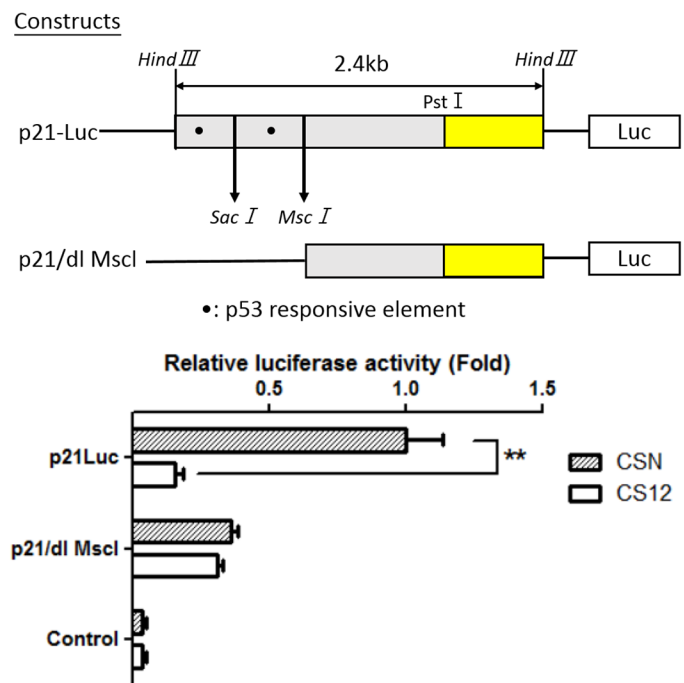**D**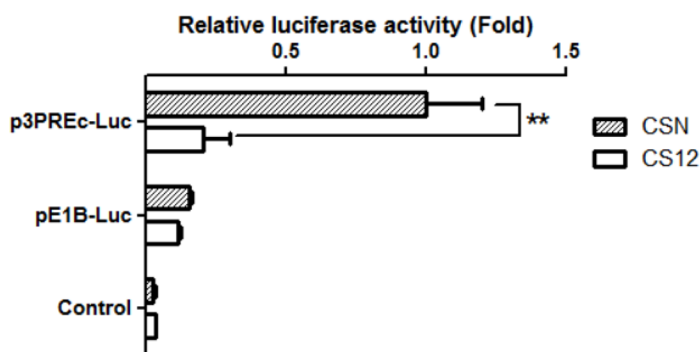

**Supplementary Figure S4: Comparative expression of cell cycle regulators in CSN and CS12 cells.** (A) Comparative expression levels of cell cycle related proteins were examined by Western blot as described in Materials and Methods. Arrows showed the indicated proteins. (B) Relative RNA expression levels of cell cycle related genes. Data were derived from three independent experiments and are presented as mean  $\pm$  SEM (Two tailed Student's *t* test; \*\* $P < 0.01$ ). (C) Comparison of activation of the p21<sup>Cip1</sup> promoter in CSN cells and CS12 cells. Schematic representation of p21<sup>Cip1</sup> promoter constructs. p21-Luc, WT p21<sup>Cip1</sup> promoter; p21/dlMscI, mutant p21<sup>Cip1</sup> promoter with deletion of upstream and downstream p53 response elements. Activation of the p21<sup>Cip1</sup> promoter in CSN cells and CS12 cells. Four hundred ng of p21<sup>Cip1</sup>, the promoter plasmid, was transfected into CSN cells and CS12 cells, and the luciferase activity was measured. The values are expressed as means  $\pm$  S.D. and *t* tests were used to compare these values with the results for p21-Luc in CSN cells set as 1.0 ( $n = 5$ , \*\* $P < 0.01$ ). (D) The luciferase activity obtained after transfection with p3PREc-Luc (three copies of consensus p53 response elements) was calculated relative to that of pE1B-Luc (control reporter with minimal E1B TATA). The luciferase activities of p3PREc-Luc was set as 1.0. ( $n = 5$ , \*\* $P < 0.01$ ).

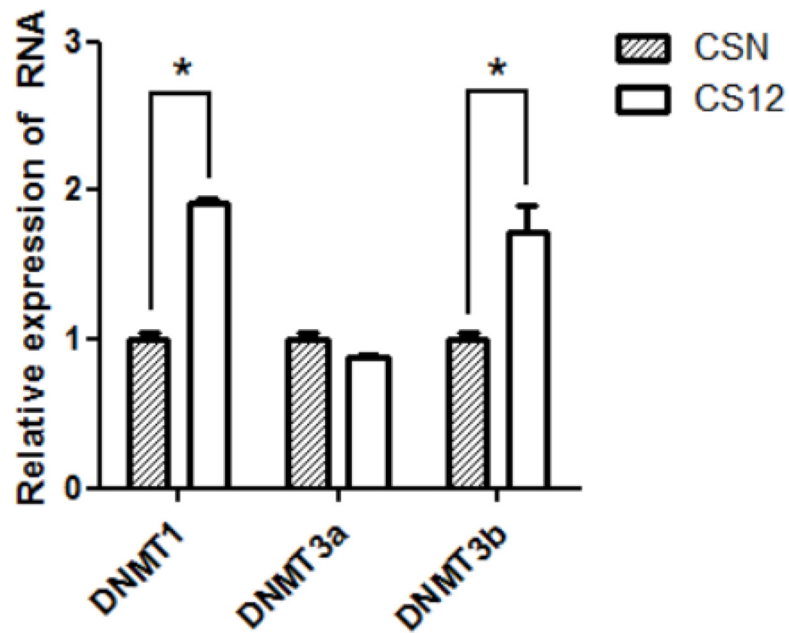

**Supplementary Figure S5: qPCR analysis of DNA methylation enzyme genes.** Comparative expression of DNMT1, DNMT3a and DNMT3b was examined by qPCR study as described in Materials and Methods. Data were derived from three independent experiments and are presented as mean  $\pm$  SEM (Two tailed Student's *t* test; \**P* < 0.05).

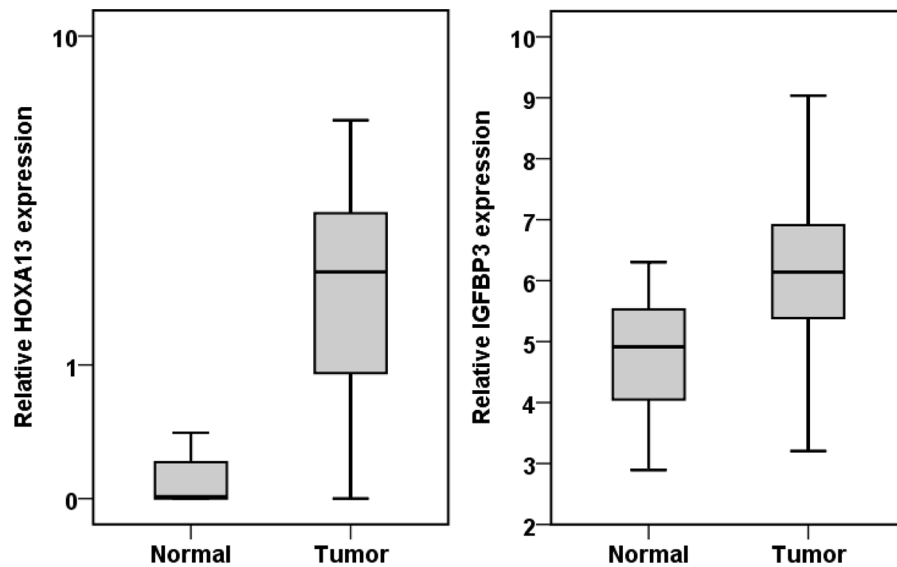

**Supplementary Figure S6: Relative expression levels of mRNAs encoding HoxA13 and IGFBP-3 in gastric cancer.** The data were retrieved from The Cancer Genome Atlas (version: 2015-02-24) and shown as box plots. The analyzed samples included 37 normal and 384 tumor tissues.

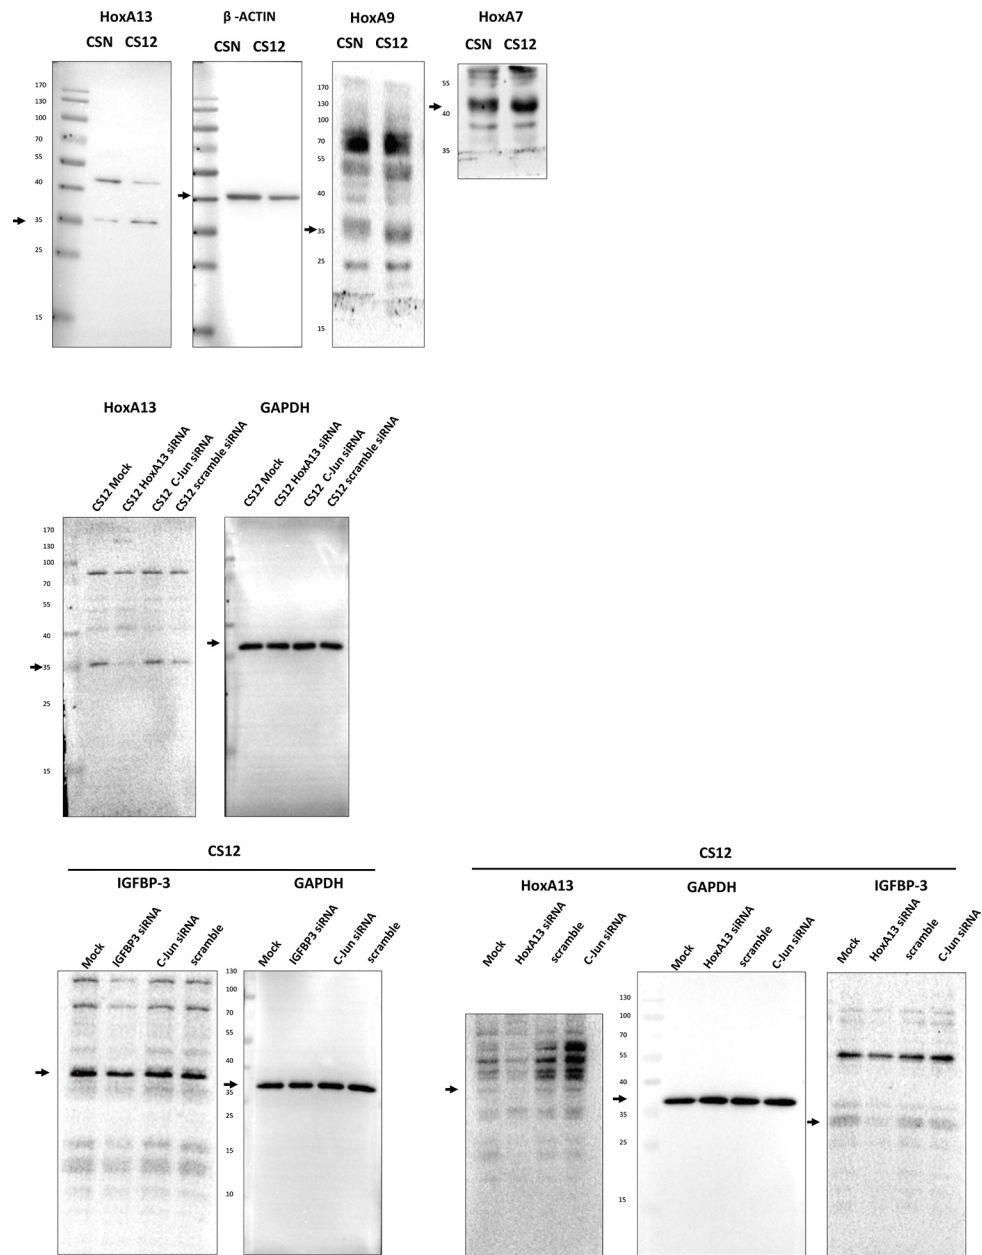

**Supplementary Figure S7: Full length western blots used in this work.** The bar boxes are as indicated in respective Figures. The molecular weight markers and the protein bands were indicated (arrowheads).

**Supplementary Table S1: HOXA13 and IGFBP1 expression in gastric cancer**

| HOXA13 (N = 57) |    |       |    | IGFBP3 (N = 28) |
|-----------------|----|-------|----|-----------------|
| Positivity      | 42 | 73.7% | 14 | 50.0%           |
| Scorea $\geq 4$ | 36 | 63.2% | 8  | 28.6%           |

<sup>a</sup>IHC score: 0 (no expression) to 7 (high expression).

**Supplementary Table S2: A list of antibodies used in this work**

| Antibodies against  | Cat. No.   | Companies                 |
|---------------------|------------|---------------------------|
| OCT4                | 2750       | Cell Signaling Technology |
| SOX2                | 39844      | Active Motif              |
| KLF4                | AF3640     | R & D System              |
| c-MYC               | 4609       | Cell Signaling Technology |
|                     | ab32       | Abcam                     |
|                     | ab56       | Abcam                     |
| NANOG               | 61420      | Active motif              |
|                     | Ab21624    | Abcam                     |
| LGR 5               | UM370104   | OriGene Tech.             |
| CD44variant         | MAB12149   | Abnova corp.              |
| MMP2                | 4022       | Cell Signaling Technology |
| MMP9                | 2270       | Cell Signaling Technology |
| SNAIL               | AF3639     | R & D System              |
| TWIST               | ab50887    | Abcam                     |
| ZEB1                | sc-25388x  | Santa Cruz Biotech Inc.   |
|                     | 61120      | Active Motif              |
| Cdk2                | 78B2       | Cell Signaling Technology |
| Cdk4                | 12790      | Cell Signaling Technology |
| Cyclin A2           | sc-239x    | Santa Cruz Biotech Inc.   |
| SSEA-1              | 09-0005    | Stegment®                 |
| SSEA-3              | 09-0014    | Stegment®                 |
| SSEA-4              | 09-0006    | Stegment®                 |
| SSEA-5              | MA1-144    | Thermo Fischer Scientific |
| Tra-1-60            | MAB4360A4  | Millipore                 |
| Tra-1-81            | MAB4381A4  | Millipore                 |
| Tra-1-85            | FCMAB248A4 | Millipore                 |
| p53                 | 9282       | Cell Signaling Technology |
|                     | SAB5100112 | Sigma Aldrich             |
| RB-1                | sc-50x     | Santa Cruz Biotech Inc.   |
|                     | 9309       | Cell Signaling Technology |
| p107                | sc-318x    | Santa Cruz Biotech Inc.   |
| p130                | sc-317x    | Santa Cruz Biotech Inc.   |
| p21 <sup>Cip1</sup> | sc-377x    | Santa Cruz Biotech Inc.   |
|                     | MAB1047    | R & D System              |
| p27 <sup>Kip1</sup> | 2552       | Cell Signaling Technology |
| p57                 | 2557       | Cell Signaling Technology |
| E-Cadherin          | 610404     | BD Biosciences            |
| C-Jun               | 60A8       | Cell Signaling Technology |

|                 |            |                           |
|-----------------|------------|---------------------------|
| Brd4            | Sc-48872x  | Santa Cruz Biotech Inc.   |
|                 | 39910      | Active Motif              |
| AFP             | AJ1019     | Abgent Inc.               |
| ABCB1           | AP6111a    | Abgent Inc.               |
| CCND3           | sc-182     | Santa Cruz Biotech Inc.   |
| JNK             | sc-571     | Santa Cruz Biotech Inc.   |
| pJNK            | 81E11      | Cell Signaling Technology |
| p-C-Jun (Ser63) | 9164       | Cell Signaling Technology |
| p-C-Jun (Ser73) | D47G9      | Cell Signaling Technology |
| GFP             | ab290      | Abcam                     |
| Pol II          | ab5408     | Abcam                     |
| HoxA1           | sc-17146x  | Santa Cruz Biotech Inc.   |
| HoxA2           | sc-17149x  | Santa Cruz Biotech Inc.   |
| HoxA4           | sc-82886x  | Santa Cruz Biotech Inc.   |
| HoxA5           | sc-28593x  | Santa Cruz Biotech Inc.   |
| HoxA7           | sc-17155x  | Santa Cruz Biotech Inc.   |
|                 | 09-086     | Millipore                 |
| HoxA9           | 07-178     | Upstate                   |
| HoxA10          | sc-17158   | Santa Cruz Biotech Inc.   |
| HoxA11          | sc-48542x  | Santa Cruz Biotech Inc.   |
| HoxA13          | sc-46123x  | Santa Cruz Biotech Inc.   |
|                 | Ab26084    | Abcam                     |
| HoxC13          | sc-82906x  | Santa Cruz Biotech Inc.   |
| HoxD13          | sc-46364x  | Santa Cruz Biotech Inc.   |
| H3K4me3         | ab8580     | Abcam                     |
|                 | 61379      | Active Motif              |
| H3K27me3        | 39158      | Active Motif              |
|                 | 39157      | Active Motif              |
|                 | SAB4000015 | Sigma Aldrich             |
| H3K27me2        | 61435      | Active Motif              |
| H3K9me3         | 39766      | Active Motif              |
|                 | SAB4000004 | Sigma Aldrich             |
| H3K9me2         | 39754      | Active Motif              |
| DNMT1           | 61468      | Active Motif              |
| DNMT3a          | 39206      | Active Motif              |
| DNMT3b          | 39207      | Active Motif              |
| DNMT3L<br>WDR5  | A-1005050  | Epigenetic Group Inc.     |
|                 | ab56919    | Abcam                     |
|                 | A302-429A  | Bethyl Lab. Inc.          |
| MLL1            | A300-087A  | Bethyl Lab. Inc.          |
| SUZ12           | 3737       | Cell Signaling Technology |
| TET1            | 61444      | Active Motif              |
| TET2            | MBP2-43552 | Novus Biologicals         |
| IGFBP-3         | orb10884   | Biorbyt                   |
|                 | ab36529    | Abcam                     |
|                 | MA1-2785   | Thermo Fischer Scientific |
|                 | sc-9028    | Santa Cruz Biotech Inc.   |

|                |         |                           |
|----------------|---------|---------------------------|
| $\beta$ -Actin | sc81178 | Santa Cruz Biotech Inc.   |
|                | 4967    | Cell Signaling Technology |
|                | ab8227  | Abcam                     |
|                | ab6276  | Abcam                     |
| GAPDH          | MAB374  | Millipore                 |
|                | 2118    | Cell Signaling Technology |
|                | ab8245  | Abcam                     |
|                | ab9485  | Abcam                     |

**Supplementary Table S3: Primer sequences of stemness genes for RT-PCR**

| Name of genes  | Sequences of primers                                                  |
|----------------|-----------------------------------------------------------------------|
| OCT3/4         | Fw: 5'-GGGTTTTTGGGATTAAGTTCTTCA-3'<br>Rw: 5'-GCCCCCACCCTTGTGTT-3'     |
| SOX2           | Fw: 5'-CAAAAATGGCCATGCAGGTT-3'<br>Rw: 5'-AGTTGGGATCGAACAAAAGCTATT-3'  |
| KLF4           | Fw: 5'-ACCTAAATGATGGTGCTTGCT-3'<br>Rw: 5'-TTGAAAACCTTGGCTTCCTTGTT-3'  |
| C-MYC          | Fw: 5'-CGGGCGGGCACTTTG-3'<br>Rw: 5'-GGAGAGTCGCGTCCTTGCT-3'            |
| NANOG          | Fw: 5'-CAGTCTGGACACTGGCTGAA-3'<br>Rw: 5'-CTCGTGATTAGGCTCCAAC-3'       |
| hTERT          | Fw: 5'-AGAGTGTCTGGAGCAAGTTGC-3'<br>Rw: 5'-CGTAGTCCATCCATGTTCAATCG-3'  |
| REX            | Fw: 5'-CAGATCCTAAACAGCTCGCAGAAT-3'<br>Rw: 5'-GCGTACGCAAATTAAGTCCGA-3' |
| JDP2           | Fw: 5'-GATGCCGGAACAAGAAGAA-3'<br>Rw: 5'-GCTTCAGCTCCTCAATCTGG-3'       |
| GAPDH          | Fw: 5'-AGGAGCGAGATCCCTCCAAA-3'<br>Rw: 5'-TGATGACCCTTTTGGCTCCC-3'      |
| $\beta$ -ACTIN | Fw: 5'-AGGCACCAGGGCGTGAT-3'<br>Rw: 5'-GCCCACATAGGAATCCTTCTGAC-3'      |

**Supplementary Table S4: Primer sequences of Hox family for RT-PCR**

| Name of genes | Sequences of primers                                                        |
|---------------|-----------------------------------------------------------------------------|
| HoxA1         | Fw: 5'-CTTCTCCAGCGCAGACTTTT-3'<br>Rw: 5'-CGCGTCAGGTACTTGTTGAA-3'            |
| HoxA2         | Fw: 5'-CCACAAAGAATCCCTGGAAA-3'<br>Rw: 5'-CCGGTTCTGAAACCACACTT-3'            |
| HoxA3         | Fw: 5'-CACAAAGCAGAAAACCGGCA-3'<br>Rw: 5'-ACAGGTAGCGGTTGAAGTGG-3'            |
| HoxA4         | Fw: 5'-CAAGGAGCCCGTGGTGTA-3'<br>Rw: 5'-CAGACAAACAGAGCGTGTGG-3'              |
| HoxA5         | Fw: 5'-CCCAGATCTACCCCTGGATG-3'<br>Rw: 5'-GGAAGGCAAAGAGCATGTG-3'             |
| HoxA7         | Fw: 5'-TATAATTTTGATTTGTGATTGTTGTT-3'<br>Rw: 5'-AAACCTCTTACCCTTCCATTCTAAA-3' |
| HoxA9         | Fw: 5'-CTCAGGAGCCTCGTGTCTTT-3'<br>Rw: 5'-CAGTTCCAGGGTCTGGTGTT-3'            |
| HoxA10        | Fw: 5'-CGCTCCCCTTCATAACAGAA-3'<br>Rw: 5'-TGCGTTTTACCTTTGGAAT-3'             |
| HoxA13        | Fw: 5'-CCTCTGGAAGTCCACTCTGC-3'<br>Rw: 5'-GGTATAAGGCACGCGCTTC-3'             |

|        |                                                                     |
|--------|---------------------------------------------------------------------|
| HoxC13 | Fw: 5'-TCAGGTGTACTGCTCCAAGG-3'<br>Rw: 5'-CAGCTGCACCTTAGTGTAGGG-3'   |
| HoxD13 | Fw: 5'-AGAATGGAGAACGAGTATGCC-3'<br>Rw: 5'-CGGTTCTGAAACCAAATGC-3'    |
| GAPDH  | Fw: 5'-ACCCACTCCTCCACCTTTGAC-3'<br>Rw: 5'-TGTTGCTGTAGCCAAATTCGTT-3' |

**Supplementary Table S5: Primer sequences of quantitative real-time RT-PCR**

| Name of genes | Sequences of primers                                                    |
|---------------|-------------------------------------------------------------------------|
| HoxA1         | Fw: 5'-ACATCTTCTCCAGCGCAGAC-3'<br>Rw: 5'-CGTGAGCTGCTTGGAGTGA-3'         |
| HoxA4         | Fw: 5'-TCCCCATCTGGACCATAATAGG-3'<br>Rw: 5'-GCAACCAGCACAGACTCTTAACC-3'   |
| HoxA7         | Fw: 5'-AAAGCGCGTTCACATAATAC-3'<br>Rw: 5'-GTTATCATATATCACTCTACCTCGT-3'   |
| HoxA9         | Fw: 5'-AGGAGTCGCTGCTTTCTGTT-3'<br>Rw: 5'-ATTAGAACGGGAGGGGTAA-3'         |
| HoxA11        | Fw: 5'-GTACTTACTACGTCTCGGGTCCAG-3'<br>Rw: 5'-AGTCTCTGTGCACGAGCTCCT-3'   |
| HoxA13        | Fw: 5'-AAATGTACTGCCCCAAAGAGCA-3'<br>Rw: 5'-ATCCGAGGGATGGGAGACC-3'       |
| HoxC13        | Fw: 5'-AAGGTGGTCAGCAAATCGAAG-3'<br>Rw: 5'-TGGTACAAAGCGGAGACATAAATAGA-3' |
| HoxD13        | Fw: 5'-CTGGGCTACGGCTACCACTTC-3'<br>Rw: 5'-GCGATGACTTGAGCGCATT-3'        |
| GAPDH         | Fw: 5'-GATTCCACCCATGCAAATCC-3'<br>Rw: 5'-TGGGATTTCATTGATGACAAG-3'       |
| HoxC13        | Fw: 5'-TCAGGTGTACTGCTCCAAGG-3'<br>Rw: 5'-CAGCTGCACCTTAGTGTAGGG-3'       |
| HoxD13        | Fw: 5'-AGAATGGAGAACGAGTATGCC-3'<br>Rw: 5'-CGGTTCTGAAACCAAATGC-3'        |
| GAPDH         | Fw: 5'-ACCCACTCCTCCACCTTTGAC-3'<br>Rw: 5'-TGTTGCTGTAGCCAAATTCGTT-3'     |

**Supplementary Table S6: Primer sequences of various genes for qPCR**

| Name of genes      | Sequences of primers                                                      |
|--------------------|---------------------------------------------------------------------------|
| HOTTIP             | Fw: 5'-CCTAAAGCCACGCTTCTTTG-3'<br>Rw: 5'-TGCAGGCTGGAGATCCTACT-3'          |
| H19                | Fw: 5'-TGCTGCACTTTACAACCACTG-3'<br>Rw: 5'-ATGGTGTCTTTGATGTTGGGC-3'        |
| HOTAIRM1           | Fw: 5'-TTGGAGTGCTGGAGCGAA-3'<br>Rw: 5'-TCCTCATTGCCATGCTAATGACGAGAGG-3'    |
| HOTAIR             | Fw: 5'-GGTAGAAAAAGCAACCACGAAGC-3'<br>Rw: 5'-ACATAAACCTCTGTTCTGTGAGTGCC-3' |
| E2F1               | Fw: 5'-AAGAGCAAACAAGGCCCCGAT-3'<br>Rw: 5'-tggtggtggtgacactatgg-3'         |
| p53                | Fw: 5'-TGAGCGCTTCGAGATGTTCC-3'<br>Rw: 5'-TTTGGACTTCAGGTGGCTGG-3'          |
| p21 <sup>CIP</sup> | Fw: 5'-ATGTCCGTCAGAACCCATGC-3'<br>Rw: 5'-TCGAAGTTCCATCGCTCACG-3'          |
| p27 <sup>KIP</sup> | Fw: 5'-GAGCAATGCGCGCAGGAATAAGG-3'<br>Rw: 5'-TTGGGAACCGTCTGAAACA-3'        |

|         |                                                                  |
|---------|------------------------------------------------------------------|
| p57     | Fw: 5'-ATCCACGATGGAGCGTCTTG-3'<br>Rw: 5'-TCGTAATCCCAGCGGTTCTG-3' |
| RB1     | Fw: 5'-TCTCACCTCCCATGTTGCTC-3'<br>Rw: 5'-GCTATCCGTGCACTCCTGTT-3' |
| DNMT1   | Fw: 5'-CCTTGGAGAACGGTGCTCAT-3'<br>Rw: 5'-GCATCTGCCATTCCCACTCT-3' |
| DNMT3A  | Fw: 5'-CCCAGGCAGCCATTAAGGA-3'<br>Rw: 5'-AGCGAAGAACATCTGGAGCC-3'  |
| DNMT3B  | Fw: 5'-CCCAGGCAGCCATTAAGGAA-3'<br>Rw: 5'-TGGGCTTCTGAACGAGTCC-3'  |
| IGFBP-3 | Fw: 5'-AATGGCCGCGGGTTCTGC-3'<br>Rw: 5'-TTCTGGGTGTCTGTGCTTTGAG-3' |
| GAPDH   | Fw: 5'-AGGAGCGAGATCCCTCCAAA-3'<br>Rw: 5'-TGATGACCCTTTTGGCTCCC-3' |

**Supplementary Table S7: Primer sequences of ChIP assay**

| Name of genes | Sequences of primers                                           |
|---------------|----------------------------------------------------------------|
| E1            | Fw: 5'-GCTTTGCATACGCCGTGGG -3'<br>Rw: 5'-CCAAGAAGTGAAGAGCGC-3' |
| NS            | Fw: 5'-ACCCATTCTGAGCTAGGCT-3'<br>Rw: 5'-ATCTGGAGCAGTGGGGACA-3' |
